# Supplementary material
Source: ML conference proceedings conference paper supplement (https://openreview.net/forum?id=_B8Jd7Nqs7R)
Supplement: supplementary_material [file attachment]

# IMPROVED GENERALIZATION BOUNDS FOR DEEP NEURAL NETWORKS USING GEOMETRIC FUNCTIONAL ANALYSIS

**Anonymous authors**

Paper under double-blind review

## A APPENDIX

### A.1 THEOREM PROOFS

**Theorem 4.** *The product of  $k$  and  $\rho$  is bounded by the metric  $(n, d)$ -span of the set  $Z$  for any  $n$  and  $d$*

$$\omega_{d_l}(Z) \geq k\rho \quad (1)$$

*Proof.* We will recall the definitions of  $C_i(n, d)$  and  $M_d(\epsilon)$  to derive a bound on  $M_d(\epsilon)$

$$\begin{aligned} C_i(n, d) &\triangleq 2^i \binom{n}{i} (d - i)^i \\ M_d(\epsilon) &\triangleq \sum_{i=0}^{n-1} C_i(n, d) \left(\frac{1}{\epsilon}\right)^i \end{aligned} \quad (2)$$

from these equations it is easy to see that

$$M_d(\epsilon) \leq \frac{(4d)^n}{\epsilon^{n-1}} \quad (3)$$

because  $\rho$  is the minimal distance between any 2 points of the finite set  $Z$ , and cardinality of  $Z$  is  $k$ , as the minimal distance between any two points is  $\rho$ , the covering number  $M(\epsilon, Z)$  is  $k$ , because around every point we draw a ball of radius  $\epsilon$  and since these balls need not be disjoint, the union of these balls covers the entire set  $Z$ . So for the set  $k$ , we have  $M(\epsilon, Z) = k$ .

substituting equation (3) in the below equation

$$\omega_d(Z) = \sup_{\epsilon \geq 0} \epsilon^n [M(\epsilon, Z) - M_d(\epsilon)] \quad (4)$$

we get the final result as

$$\begin{aligned} \omega_d(Z) &\geq [k\rho^n - (4d)^n \rho] \\ &\geq k\rho \end{aligned} \quad (5)$$

□

### A.2 EXPERIMENTAL SETUP

In all the experiments we use SGD with learning rate 0.1 and batch size 32. We train the network on a training dataset of 60000 images of flatten to a input vector of size 784. We stop training when we classify at least 99% of the data perfectly and  $\rho$  is computed by randomly sampling some 1000 datapoints from the training dataset.
